# Supplementary material for: Annotation and cluster analysis of long noncoding RNA linked to male sex and estrogen in cancers
Source: PubMed Central journal article supplement (PMC7054536; doi:10.1038/s41698-020-0110-5), 2020-03-03
Supplement: 41698_2020_110_MOESM1_ESM.pdf [file 41698_2020_110_MOESM1_ESM.pdf]

# Supplementary Information for

Annotation and cluster analysis of long noncoding RNA linked to male sex and estrogen in cancers

Shouping Liu<sup>1,2</sup>, Weiwei Lai<sup>1,2</sup>, Ying Shi<sup>1,2</sup>, Na Liu<sup>1,2</sup>, Lianlian Ouyang<sup>1,2</sup>, Ziyang Zhang<sup>1,2</sup>, Ling Chen<sup>1,2</sup>, Ya Cao<sup>1</sup>, Xiang Wang<sup>3</sup>, Banglun Qian<sup>3</sup>, Desheng Xiao<sup>1,4,5</sup>, Qin Yan<sup>6</sup>, Shuang Liu<sup>1,4\*</sup>, Yongguang Tao<sup>1,2,3,\*</sup>

Correspondence to: taoyong@csu.edu.cn, shuangliu2016@csu.edu.cn

**This PDF file includes:**

Supplementary Figure 1-8, Supplementary Table 1.

## Supplementary Figure 1

Supplementary Figure 1

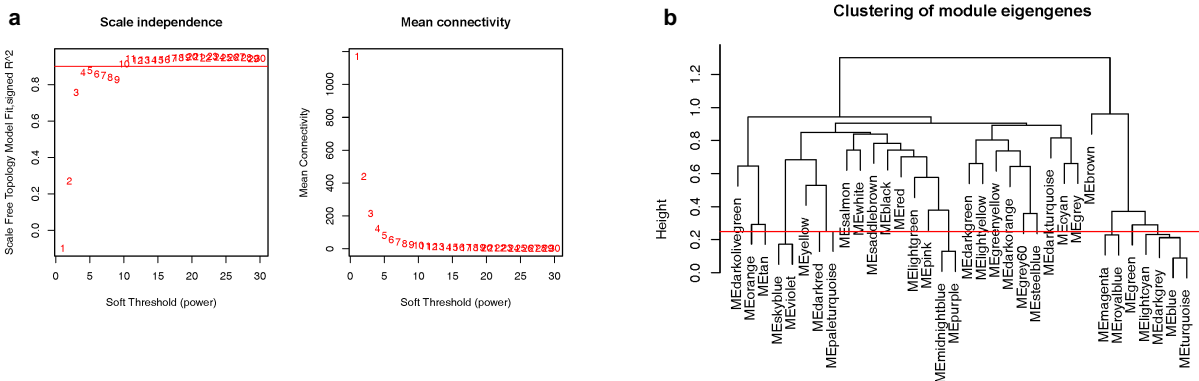

Supplementary Figure 1. Analysis of network topology for various soft-thresholding powers and Sample clustering to detect outliers. **a** Network topology for different soft-thresholding powers. Numbers in the plots indicate the corresponding soft thresholding powers. The approximate scale-free topology can be attained at the soft-thresholding power of 8. **b** Dendrogram of consensus module eigengenes obtained by WGCNA on the consensus correlation. The red line is the merging threshold, and groups of eigengenes below the threshold represent modules whose expression profiles should be merged due to their similarity.

## Supplementary Figure 2

### Supplementary Figure 2

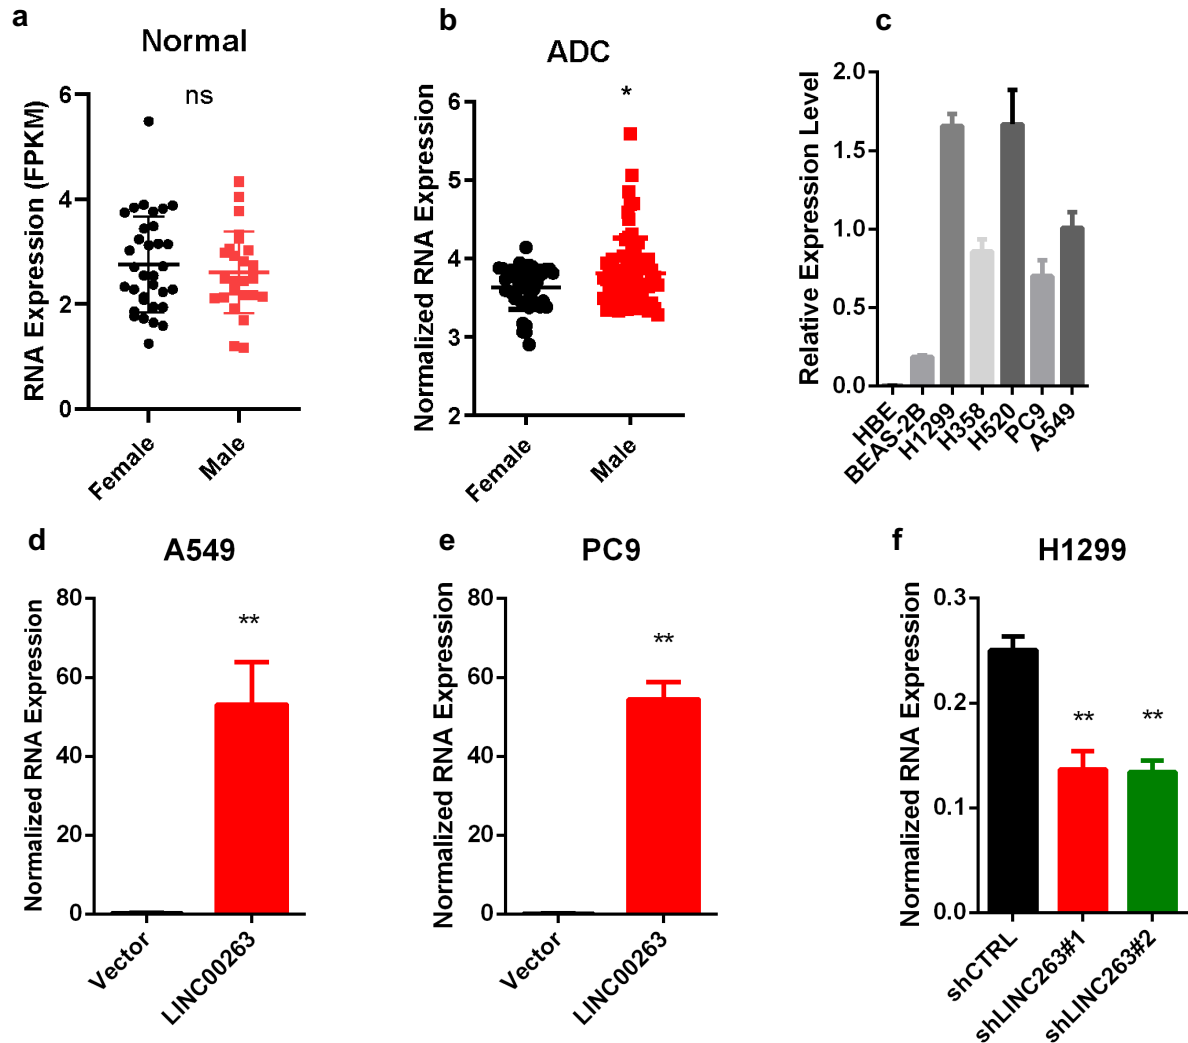

Supplementary Figure 2. The expression of LINC00263 in ADC and lung cancer cells and the detection of LINC00263 over-expression or knockdown efficient. **a** the expression of LINC00263 from ADC patient normal tissues in males and females. Data from the TCGA database. **b** the expression of LINC00263 is higher in 69 male patients than 44 female patients ( $P=0.0167$ ). Data from the GEO database (GSE50081). **c** RT-qPCR analysis was conducted to detect the level of LINC00263 in HBE, BEAS-2B, H1299, H358, H520, PC9 and A549 cell lines. **d, e** A RT-qPCR analysis was conducted to detect the level of LINC00263 in A549 (**d**) and PC9 (**e**) cells stably

overexpressing LINC00263. **f** RT-qPCR analysis to detect the level of LINC00263 in H1299 cells stably transfected with two distinct target shRNA vectors and control cells. Data are shown as the mean  $\pm$  SEM;  $n \geq 3$  independent experiments, two-tailed Student's t-test: ns nonsignificant ( $P > 0.05$ ), \* $P < 0.05$ , \*\* $P < 0.01$ , \*\*\* $P < 0.001$

### Supplementary Figure 3

Supplementary Figure 3

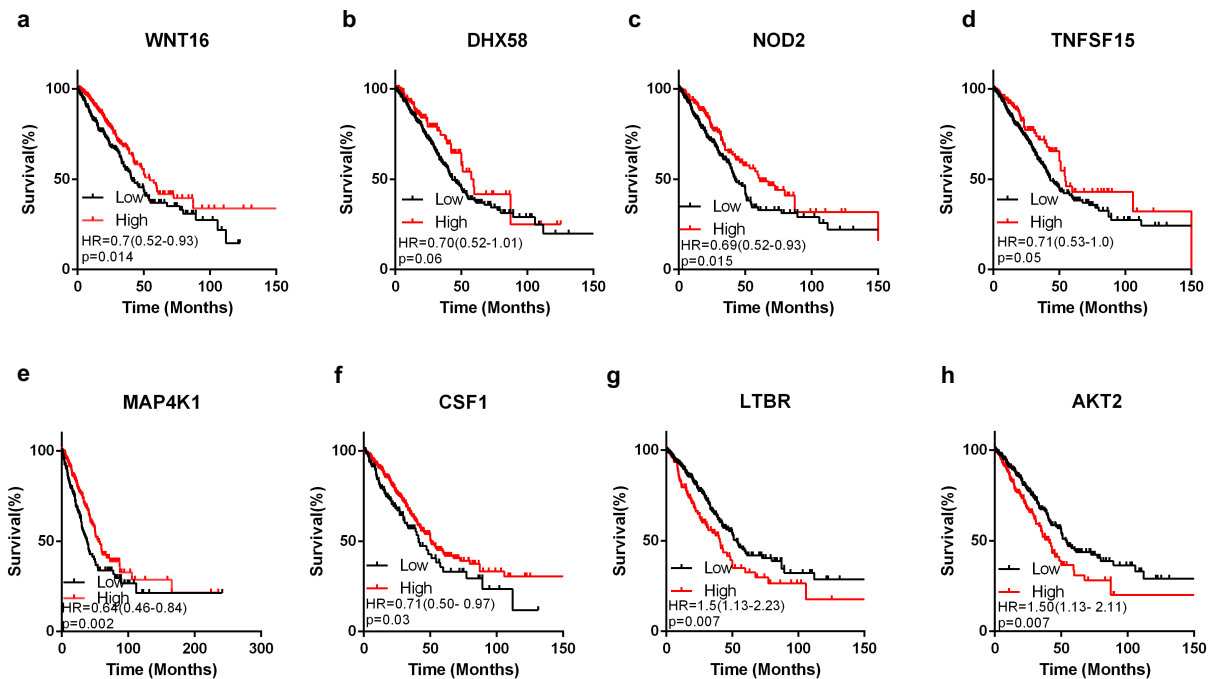

Supplementary Figure 3. Kaplan-Meier curves for overall survival rates associated with associated gene expression. **a** WNT16. **b** DHX58. **c** NOD2. **d** TNFSF15. **e** MAP4K1. **f** CSF1. **g** LTBR. **h** AKT2.

## Supplementary Figure 4

Supplementary Figure 4

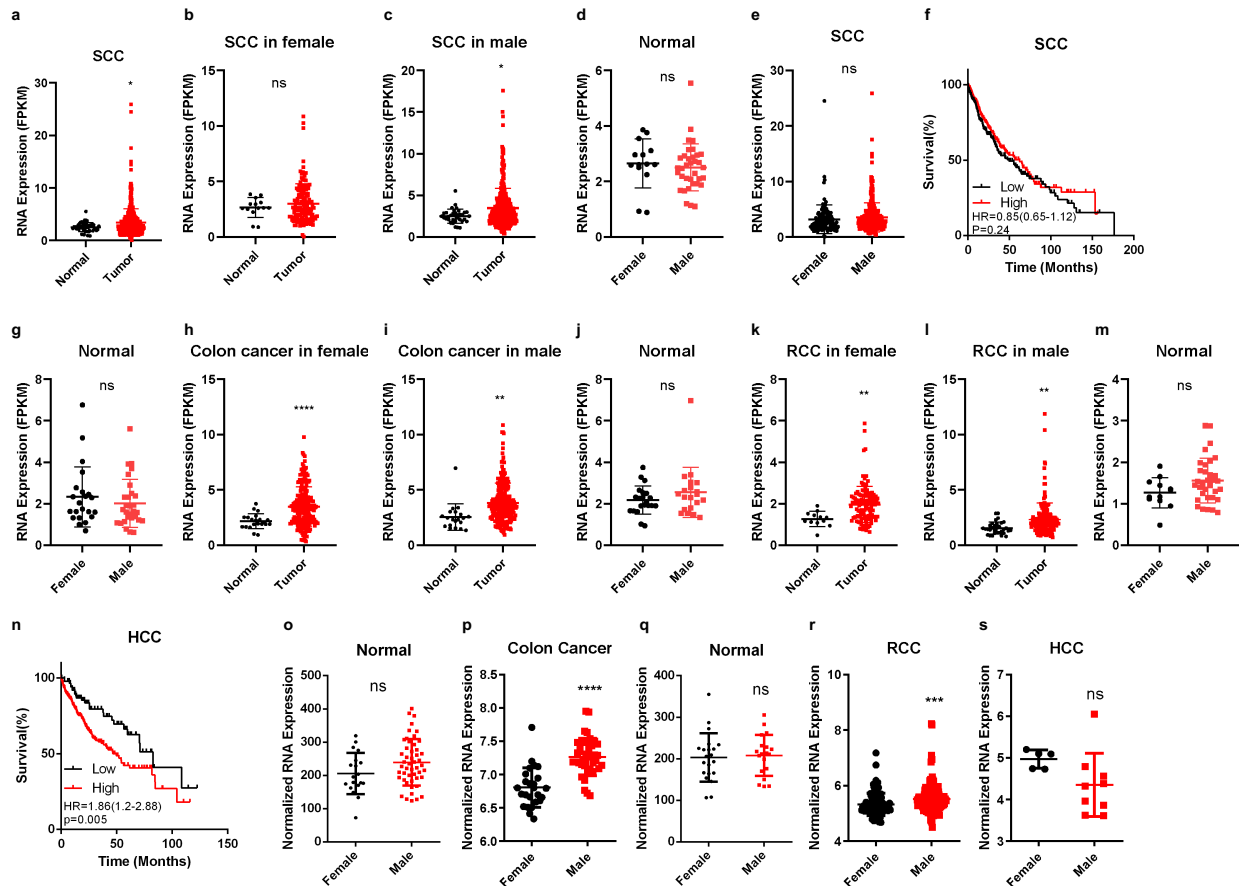

Supplementary Figure 4. The expression of LINC00263 in SCC, colon cancer, RCC and HCC. **a** the expression of LINC00263 is higher in 502 tumor tissue than 49 normal tissue in SCC ( $P=0.01$ ). The different expression of LINC00263 between normal and tumor by sex in SCC (**b**, **c**), colon cancer (**h**, **i**) and RCC (**k**, **l**). The expression of LINC00263 between females and males in normal tissue or tumor tissue in SCC (**d**, **e**), colon cancer (**g**), RCC (**j**) and HCC (**m**). Data from the TCGA database. Kaplan-Meier curves for overall survival rates associated with LINC00263 expression in SCC (**f**) and HCC (**n**). **o**, **p** the expression of LINC00263 is higher in 40 male patients than 25 female patients in colon cancer ( $P<0.0001$ ). Data from the GEO database (GSE29621). **q**, **r** the expression of LINC00263 is higher in 160 male patients than 102 female patients in RCC

( $P=0.001$ ). Data from the GEO database (GSE73731). s the expression of LINC00263 from the GEO database for hepatic carcinoma (GSE84402). There is no significant difference between 9 male patients and 5 female patients,  $P=0.1032$ . Data are shown as the mean  $\pm$  SEM;  $n \geq 3$  independent experiments, two-tailed Student's t-test: ns nonsignificant ( $P > 0.05$ ), \* $P < 0.05$ , \*\* $P < 0.01$ , \*\*\* $P < 0.001$

### Supplementary Figure 5

Supplementary Figure 5

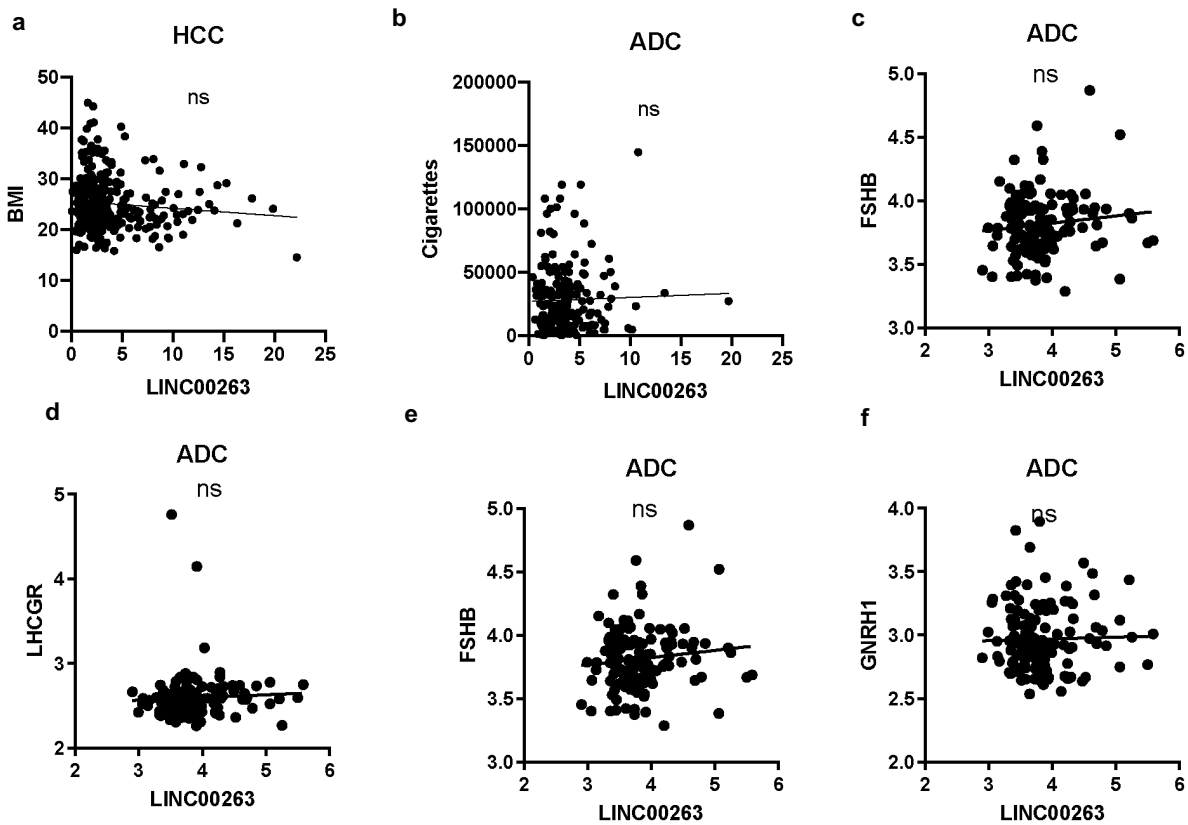

Supplementary Figure 5. The expression of LINC00263 has no significant correlation with BMI, cigarettes or the expression of PRL, LHCGR, FSHB, or GNRH1. Correlation between LINC00263 and BMI (a), cigarette counts (b), and the expression level of PRL (c) LHCGR (d) FSHB (e) and GNRH1(f) were analyzed.



## Supplementary Figure 6

Supplementary Figure 6

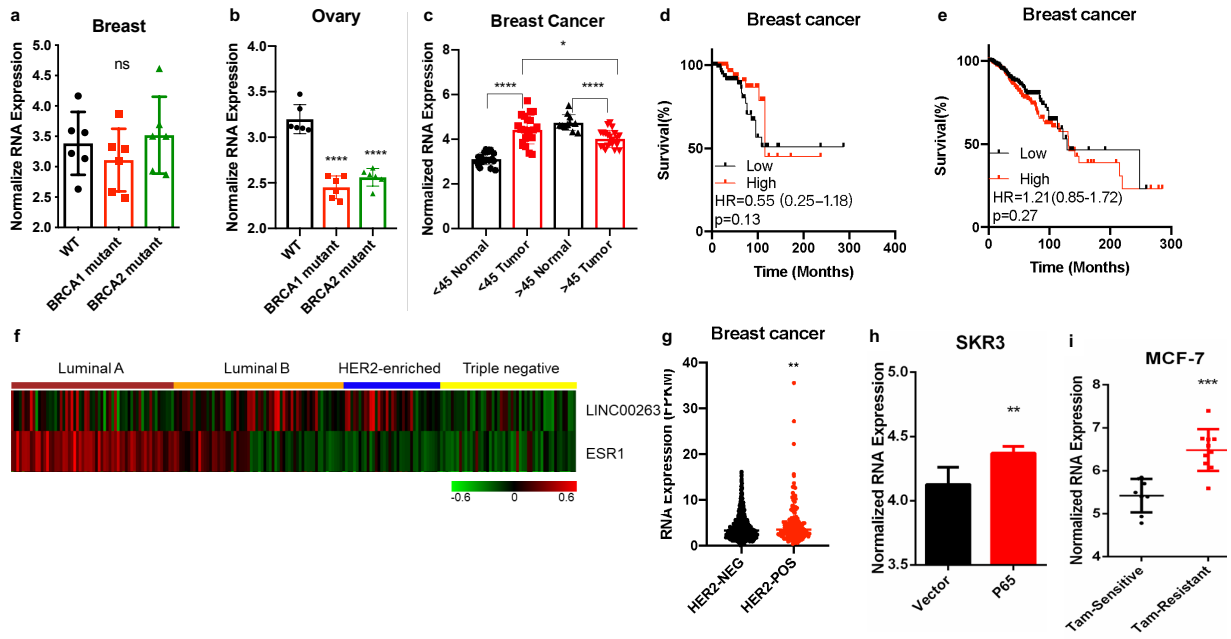

Supplementary Figure 6. The expression of LINC00263 in breast cancer, ovarian cancer, SKR3 cells and MCF-7 cells. The expression of LINC00263 in the WT patients, BRCA1 mutant patients and BRCA2 mutant patients from breast cancer (a) or ovarian cancer (b). Data from the GEO database (GSE19383). c Analysis of the expression of LINC00263 in breast cancer patients of different ages. Data from the GEO database (GSE29044). d, e Kaplan-Meier curves for overall survival rates associated with LINC00263 expression in younger than 45 years old breast cancer patients (d) and older (e). f the heatmap of LINC00263 and ESR1 in the different types of breast cancers. Data from the GEO database (GSE26639). g the expression of LINC00263 in HER-2 negative and HER-2 positive breast cancers. Data from the TCGA database. h analysis of the expression of LINC00263 in HER-2 positive cells with activated P65. Data from the GEO database (GSE52707). i comparison of the expression of LINC00263 between tamoxifen sensitive cells and

tamoxifen resistant cells. Data from the GEO database (GSE67916). Data are shown as the mean  $\pm$  SEM;  $n \geq 3$  independent experiments, two-tailed Student's t-test: ns nonsignificant ( $P > 0.05$ ), \* $P < 0.05$ , \*\* $P < 0.01$ , \*\*\* $P < 0.001$

### Supplementary Figure 7

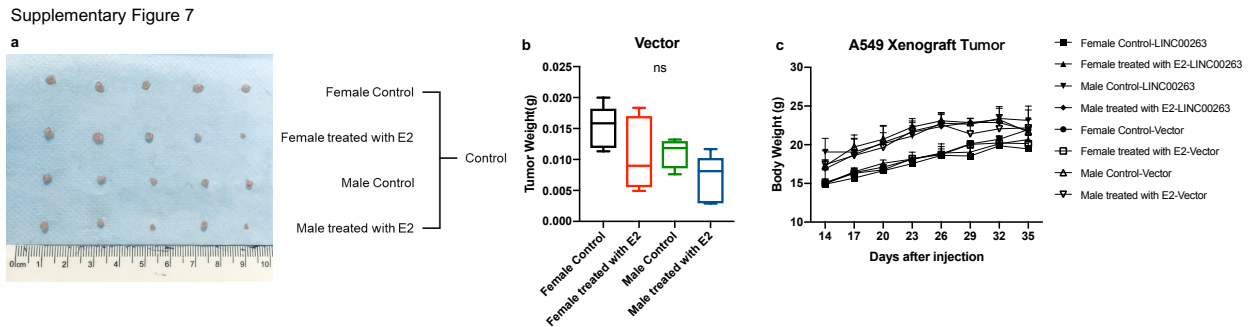

Supplementary Figure 7. Nude mice after the injection of A549 stably expressing the control vector expression are shown. Tumor formation was monitored at the indicated times; images (a), weights (b) and the weight change in nude mice (c) were recorded ( $n=8$ ). Data are shown as the mean  $\pm$  SEM;  $n \geq 3$  independent experiments, two-tailed Student's t-test: ns nonsignificant ( $P > 0.05$ ), \* $P < 0.05$ , \*\* $P < 0.01$ , \*\*\* $P < 0.001$

### Supplementary Figure 8.



Supplementary Figure 8

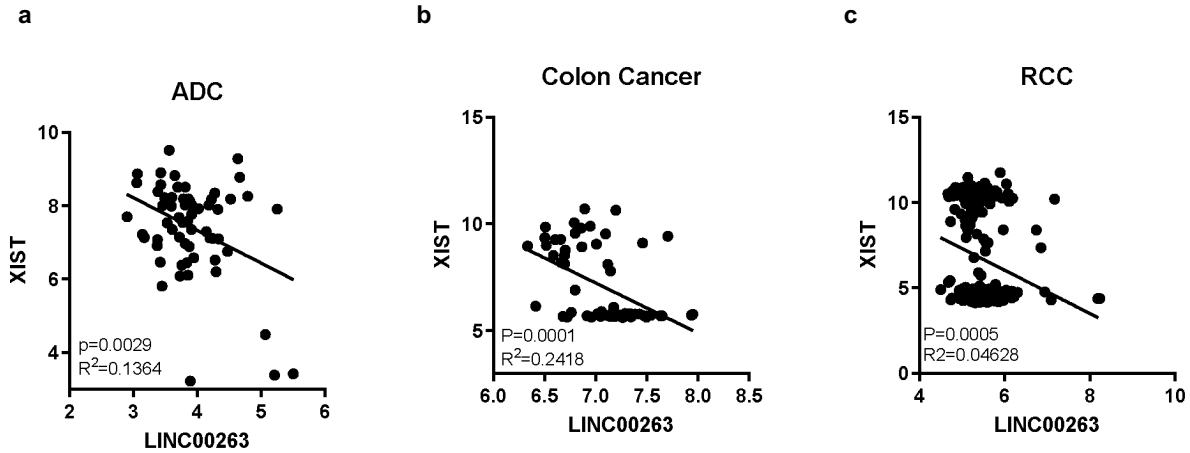

Supplementary Figure 8. The expression of *LINC00263* is significantly negatively correlated with *XIST*. Correlation between *XIST* and *LINC00263* in lung adenocarcinoma (a), colorectal cancer renal (b) and clear cell carcinoma (c).

Supplementary Table.1

| GEO datasets used for research |          |          |                               |
|--------------------------------|----------|----------|-------------------------------|
| Series                         | Platform | PMID     | Relative Supplementary Figure |
| GSE14407                       | GPL570   | 20040092 | Figure5s, Figure6a            |
| GSE119087                      | GPL570   | 31091168 | Figure6c                      |
| GSE11352                       | GPL570   | 17542648 | Figure6d                      |
| GSE11428                       | GPL570   | 19632176 | Figure6e                      |
| GSE7868                        | GPL570   | 17679089 | Figure6f                      |
| GSE6364                        | GPL570   | 17510236 | Figure6i                      |
| GSE11622                       | GPL570   | 18578861 | Figure6j                      |
| GSE22600                       | GPL570   | 20959477 | Figure6k, 6l                  |
| GSE26459                       | GPL570   | 21233418 | Figure6m, 6n                  |
| GSE50081                       | GPL570   | 24305008 | Supplementary Figure 2b       |
| GSE29621                       | GPL570   | 22362069 | Supplementary Figure 4o, 4p   |
| GSE73731                       | GPL570   | 28779136 | Supplementary Figure 4q, 4r   |
| GSE84402                       | GPL570   | 28810927 | Supplementary Figure 4s       |
| GSE19383                       | GPL570   | 20051372 | Supplementary Figure 6a, 6b   |
| GSE29044                       | GPL570   | 23704896 | Supplementary Figure 6c       |
| GSE26639                       | GPL570   | 21631949 | Supplementary Figure 6f       |
| GSE52707                       | GPL570   | 24319068 | Supplementary Figure 6h       |
| GSE67916                       | GPL570   | 24882577 | Supplementary Figure 6i       |
